# Supplementary material
Source: PubMed Central journal article supplement (PMC4030808)
Supplement: supp_mcu036_mcu036supp.pdf [file supp_mcu036_mcu036supp.pdf]

## SUPPLEMENTARY DATA

### METHODS

#### Construction of coexpression constructs

For the co-expression of *MtSEO-F* genes, pBatTL expression cassettes (Müller *et al.*, 2010) containing the double-enhanced CaMV 35S promoter (d35S-P), *MtSEO-F* gene and CaMV 35S terminator sequence (T<sub>35S</sub>) were amplified using forward primers 5'-AGA CAC GTG ATG GTG GAG CAC GAC ACA C-3' for d35S-P-MtSEO-F1-T<sub>35S</sub>, 5'-AGA CCC GGG ATG GTG GAG CAC GAC ACA C-3' for d35S-P-MtSEO-F2-T<sub>35S</sub> and d35S-P-MtSEO-F4-T<sub>35S</sub>, in each case combined with the same reverse primer 5'-AGA CCC GGG GGT CAC TGG ATT TTG GTT T-3'. The d35S-P-MtSEO-F1-T<sub>35S</sub> cassette was digested with *PmlI/SmaI* and introduced into the *SmaI* site of pBIN19 (Bevan, 1984) to obtain pBIN19-d35S-P-MtSEO-F1-T<sub>35S</sub>. The other cassettes were digested with *SmaI* and introduced into the *SmaI* site of the pBIN19-d35S-P-MtSEO-F1-T<sub>35S</sub> vector to yield vectors pBIN19-d35S-P-MtSEO-F1-T<sub>35S</sub>-d35S-P-MtSEO-F2-T<sub>35S</sub> and pBIN19-d35S-P-MtSEO-F1-T<sub>35S</sub>-d35S-P-MtSEO-F4-T<sub>35S</sub>, respectively. The d35S-P-MtSEO-F4-T<sub>35S</sub> vector was also amplified using forward primer 5'-AGA CAC GTG ATG GTG GAG CAC GAC ACA C-3' and reverse primer 5'-AGA CCC GGG GGT CAC TGG ATT TTG GTT T-3', and the product was transferred to pBIN19. The d35S-P-MtSEO-F2-T<sub>35S</sub> cassette was inserted using the same strategy, yielding vector pBIN19-d35S-P-MtSEO-F4-T<sub>35S</sub>-d35S-P-MtSEO-F2-T<sub>35S</sub>. The co-expression of all three *MtSEO* genes and the co-expression of MtSEO-F2 with SEO-F genes from other species were achieved by transferring the d35S-P-MtSEO-F2-T<sub>35S</sub> cassette into a pBIN19 vector containing an independent mRFP marker as an expression control. The *nos* promoter (NosP) was amplified by PCR using forward primer 5'-AGA GGT ACC GAT CAT GAG CGG AGA ATT AAG-3' and reverse primer 5'-AGA CCA TGG GAA ACG ATC CAG ATC CG-3', the mRFP was amplified using forward primer 5'-AGA CCA TGG GAA TGG CCT CCT CCG AG-3' and reverse primer 5'-AGA TCT AGA TGG GCG CCG GTG GAG TGG C-3' and the *nos* terminator (NosT) was amplified using forward primer 5'-AGA TCT AGA TGA GCG GGA CTC TGG GGT TC-3' and reverse primer 5'-CCC GAT CTA GTA ACA TAG ATG-3'. The fragments were digested *KpnI/NcoI* (NosP), *NcoI/XbaI* (mRFP)

and *XbaI* (NosT) and were inserted into vector pBluescript II KS+ (Agilent Technologies) linearized with *KpnI/SmaI*. The resulting vector pBS–NosP–mRFP–NosT was digested with *NheI/AflIII*, resulting in a fragment containing the *mRFP* flanked by parts of the NosP and NosT. The vector pBIN19 was also digested with *NheI/AflIII* to eliminate the kanamycin-resistance gene also flanked by a NosP and NosT, replacing it with the *mRFP* fragment. The new vector was designated pBIN19–NosP–mRFP–NosT. The d35S–P–MtSEO–F2–T<sub>35S</sub> cassette was then amplified using forward primer 5'-AGA GAG CTC ATG GTG GAG CAC GAC ACA C-3' and reverse primer 5'-AGA GAG CTC GGT CAC TGG ATT TTG GTT T-3', digested with *SacI* and inserted into the multiple cloning site of pBIN19–NosP–mRFP–NosT to yield pBIN19–d35S–P–MtSEO–F2–T<sub>35S</sub>–NosP–mRFP–NosT. Restriction sites in the oligonucleotide sequences are underlined. All constructs were verified by sequencing (Sanger *et al.*, 1977) on an ABI PRISM® 3100 Genetic Analyser (Applied Biosystems, Germany).

#### Construction of pENTR4™ vectors

The full-length *DpSEO-F1* cDNA sequence was amplified using forward primer 5'-AAA CCA TGG CAT CAT TGT CCA ACG GAG CT-3' and reverse primer 5'-AAA GCG GCC GCT TAG CAA ATC TTT TGA CCA TC-3'. The full-length *LjSEO-F1* cDNA sequence was amplified using forward primer 5'-AGA GTC GAC ATG TCA CAT GTG CCC AAG-3' and reverse primer 5'-AGA GCG GCC GCT CAG ATG CCA AAA CCA TTT G-3'. The sequences were amplified three times with independent cDNAs and consensus sequences were derived. The products were digested with *NcoI/NotI* (*DpSEO-F1*) or *SalI/NotI* (*LjSEO-F1*), and inserted into the *NcoI/NotI* or *SalI/NotI* sites of pENTR4™ (Invitrogen). Consensus sequences were obtained by side-directed mutagenesis (Agilent Technologies).

Primers for *CgSEOa*, *PsSEO-F1* and *VfSEO-F1* were designed based on published sequences (Noll *et al.*, 2007; Tuteja *et al.*, 2010). Products were amplified from *C. gladiata* cDNA using forward primer 5' AGA CCA TGG CAT CCG ACT CCA AGC CAC-3' and reverse primer 5'-AGA CTC GAG TCA AAC TTT AGC AGT GTC-3'. Products were amplified from *P. sativum* cDNA using forward primer 5'-AGA CCA TGG CAT CCT TTT CTA ACT CAG CTG 3' and reverse primer 5'-AGA CTC GAG TCA AAC ACC AAA ATT ATT TG-3'. Products were amplified from *V. faba* cDNA using forward primer 5'-AGA CCA

TGG CAT CCT TTT CTA ACT CAC CTG CTG CTG CTA CT-3' and reverse primer 5'-AGA CTC GAG TCA AAC ACC AAA GTT ATT TG-3'. Products were digested with *NcoI/XhoI* and inserted into the *NcoI/XhoI* sites of pENTR4™ (Invitrogen). Restriction sites in the oligonucleotide sequences are underlined. All products were verified by sequencing.

#### Construction of binary vectors for root transformation

The promoters of the four *MtSEO-F* genes were amplified as follows: The *MtSEO-F1* promoter was amplified from *PMtSEO-F1-GFP<sub>ER</sub>* (previously named *Pmtfor1-GFP<sub>ER</sub>*; Noll *et al.*, 2007) using forward primer 5'-AGA GGT ACC AGT CGA CGT CCA TTC GTA CAT GCA GAA A-3' and reverse primer 5'-AGA CTC GAG ACC ATG GTG ATA AAT TCA ACT TTA GGC-3'. The *MtSEO-F2* promoter was amplified from *pBPMtSEO2-GFP<sub>ER</sub>* (Noll *et al.*, 2009) using forward primer 5'-AGA GGT ACC AGT CGA CAA CAA TGC AAA TGA ACA AAA TTA-3' and reverse primer 5'-AGA CTC GAG ACC ATG GTG ATG ATT TGT TTA TAA ATT AA-3'. The *MtSEO-F3* promoter was amplified from *pBPMtSEO3-GFP<sub>ER</sub>* (Noll *et al.* 2009) using forward primer 5'-AGA GGT ACC AGT CGA CAA TCC ATT GCT TGT TAT CGC-3' and reverse primer 5'-AGA CTC GAG ACC ATG GTA GGC CAA GAA AGT TAT TAT ATC-3'. Finally the *MtSEO-F4* promoter was amplified from *pBPMtSEO4-GFP<sub>ER</sub>* (kindly provided by Dr. Boris Rüping) using forward primer 5'-AGA GGT ACC AGT CGA CAT ACA CAT AAA ATT CTA AAC AG A-3' and reverse primer 5'-AGA CTC GAG ACC ATG GGA TGA CTT AAT ATT AGA GGA G-3'. The *hrGFP* fragment fused to the CaMV T<sub>35S</sub> was amplified from *pBShrGFP* (kindly provided by Dr. Boris Rüping) using forward primer 5'-AGA CTC GAG AAT GGT GAG CAA GCA GAT C-3' and reverse primer 5'-AAA GAA TCC CTG CAG GTC ACT GGA TT-3'. The promoter fragments were digested with *KpnI/XhoI*, the *hrGFP-T<sub>35S</sub>* fragment was digested *XhoI/EcoRI* and both were inserted into the corresponding sites of pUC18 (Yanisch-Perron *et al.*, 1985) to yield vectors pUC18-*PMtSEO-FX-hrGFP*, where X specifies the promoter. The *MtSEO-F* genes were amplified from the corresponding pENTR4™-*MtSEO-F* constructs (Müller *et al.*, 2010) using forward primer 5'-AGA CCA TGG AAT CAT TGT CCA ATG GAA CTA-3' and reverse primer 5'-AGA CTC GAG AGT ATC TTG CCA TTC TGT GGA G-3' for *MtSEO-F1*, forward primer 5'-AGA CCA TGG

AAT CCA CTG CAT TGT CCT AT-3' and reverse primer 5'-AGA CTC GAG AGA ATG CAG CAA CTA TCT GGA TC-3' for *MtSEO-F2*, forward primer 5'-AGA TCA TGA AGT CGT CTT CAA TGG CGC C-3' and reverse primer 5'-AGA CTC GAG AGA GAC CT TTT CTC AAT CTG AAC-3' for *MtSEO-F3* and forward primer 5'-AGA CCA TGG AAT CCC TTT CCA ACT TAG GA-3' and reverse primer 5'-AGA ACT CGA GCC AAC ACC AAG ATT GTT TGG TTC-3' for *MtSEO-F4*. The PCR products were digested *NcoI/XhoI* (*MtSEO-F1*, *MtSEO-F2* and *MtSEO-F4*) or *BspHI/XhoI* (*MtSEO-F3*), and inserted into the *NcoI/XhoI* site of pUC18-*PMtSEO-F-hrGFP* to complete the pUC18-*PMtSEO-F-MtSEO-F-hrGFP* constructs. The expression cassettes were digested with *SalI/SmaI* and inserted into the corresponding sites of the binary vector pBIN19 (Bevan 1984). As a control, *hrGFP* was expressed under the control of the *PMtSEO-F1* promoter by inserting the *PMtSEO-F1-hrGFP-T<sub>35S</sub>* cassette into pBIN19. Restriction sites in the oligonucleotide sequences are underlined. All constructs were verified by sequencing.

**FIG. S1.** A phylogram created with FastTree2 based on a MUSCLE (Edgar, 2004) amino acid alignment. SEO proteins previously described by Rüping *et al.*, (2010) as well as DpSEO-F1 and LjSEO-F1 were used to construct the phylogram. The number of amino acid substitutions is related to branch length and bootstrap values are indicated.

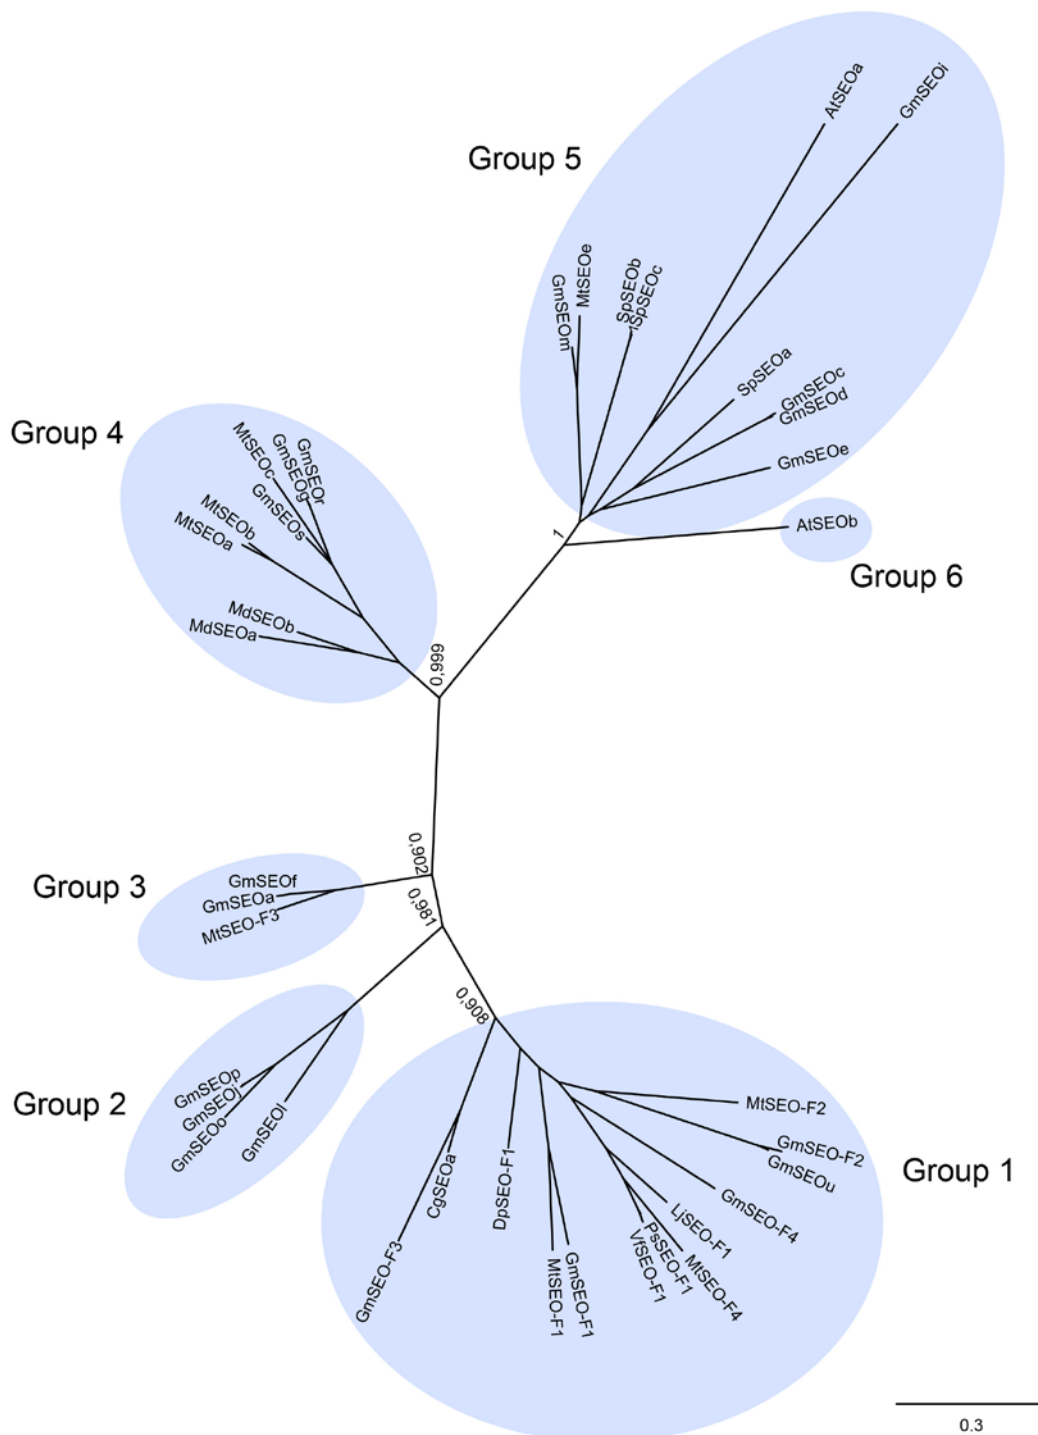

**FIG. S2.** Alignment of the SEO protein family (Rüping *et al.*, 2010) now including DpSEO-F1 and LjSEO-F1. Conspicuous segments containing at least seven neighbouring amino acids that are identical or showing conserved substitutions in all group 1 proteins are indicated with a black box and numbered M5-M9. The previously-described motifs 1 and 2 (Rüping *et al.*, 2010) are also indicated. The alignment was created using MUSCLE (Edgar, 2004).

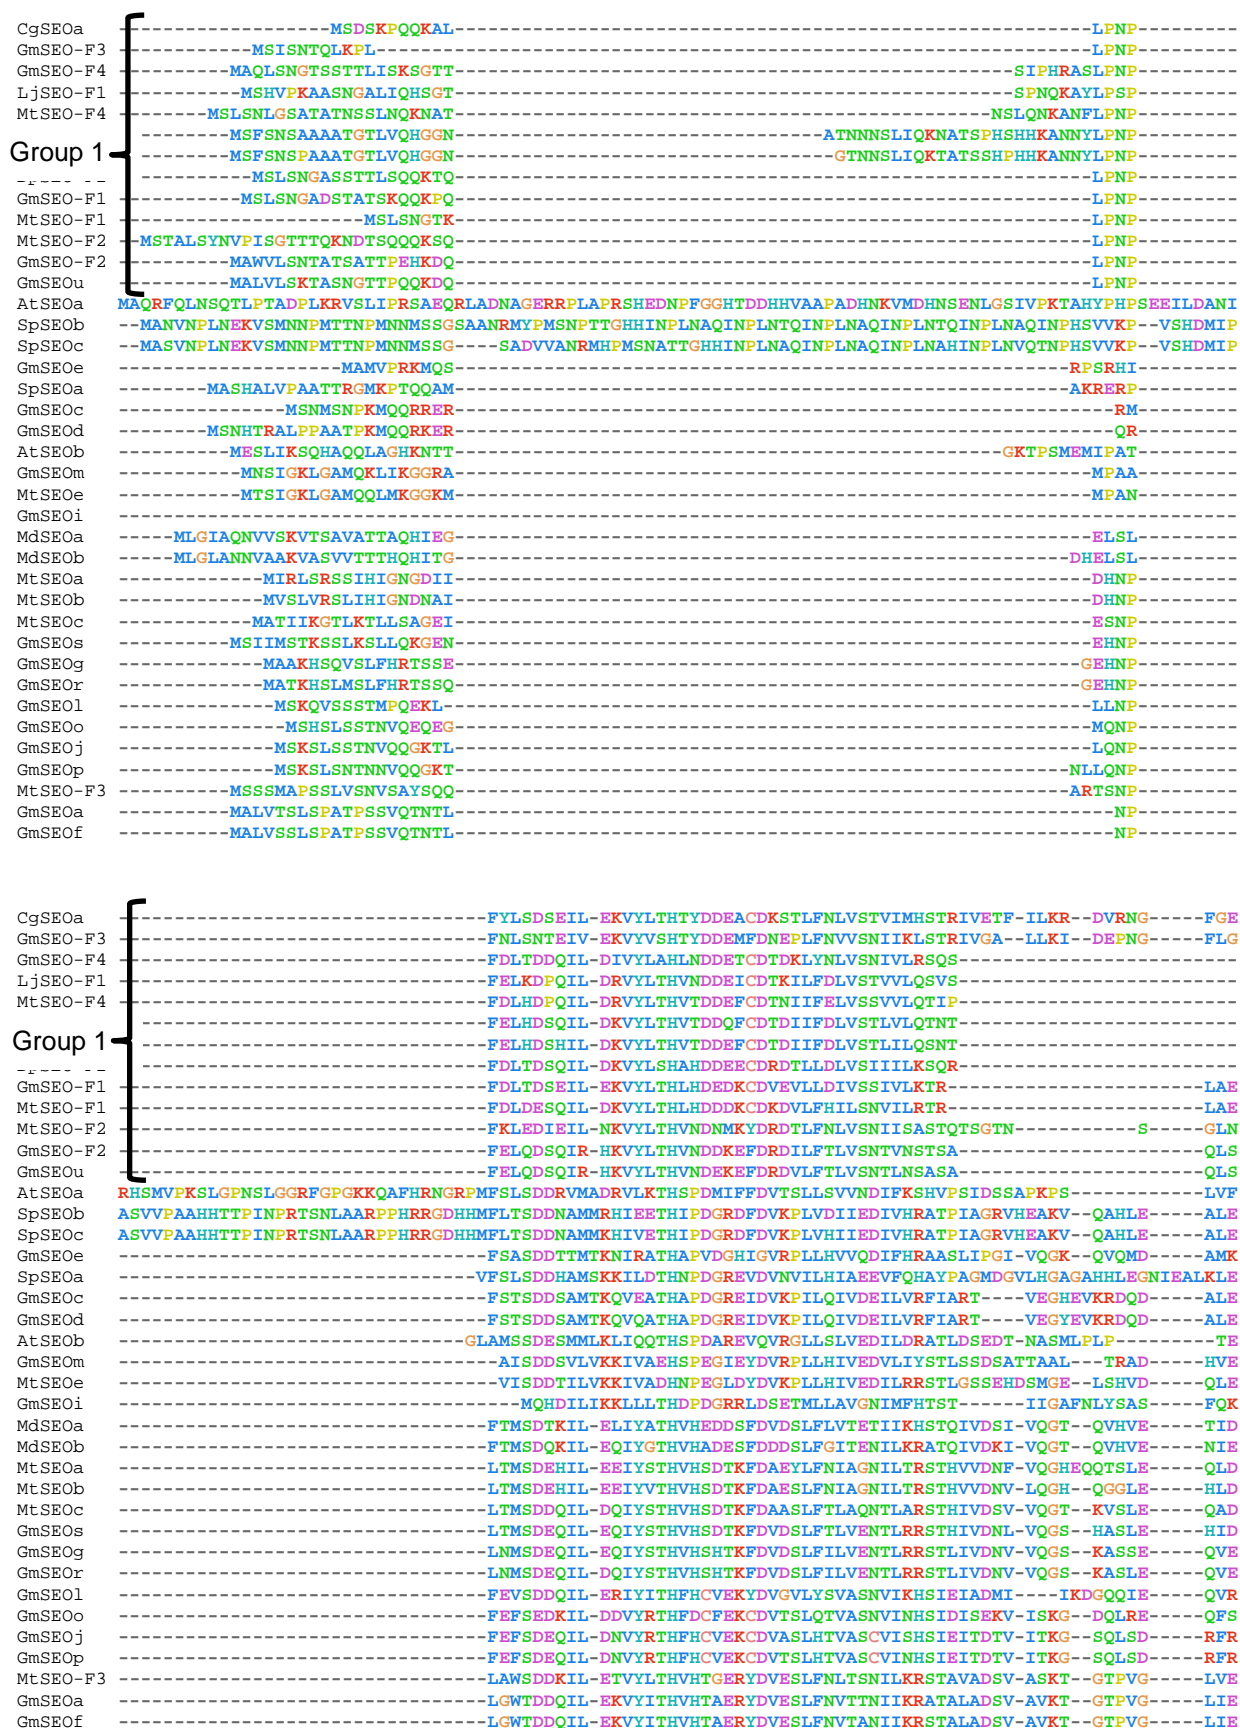

Motif 5

Motif 6

CgSE0a **GKIL-ITE**---FKPEFHKLKLLSCQMITTP-SGLENA-----HQTMRILQQLRSFSWGTALIALAFAFALEYGNFWNLQ--LPPSDQLGNSL  
 GmSE0-F3 **NPIT-ISS**---FKPEFSTLKLMSQMMITLP-WQEPENA-----HQTTLRILQQLRKYSWDAKALIALAFAFALEYGNFWNLQ--ASDPLGNSL  
 GmSE0-F4 **PIIS-AAS**---FKPDFLTKLKLISQCMISTR-SAAHCV-----HQTMMWILQHLKCYSDAKALIALAFAFALEYGNFWNLQ--FQNTDPLGNSL  
 LjSE0-F1 **QIP-ATS**---FKPEFSTLKLISQCMITTR-NADHCV-----HQTMMWILQNLRSYSWDAKALITLAAFTLEYGNLHLRSR-AAVADTLGSSL  
 MtSE0-F4 **KIS-VTS**---FKPEFPTLKLISQCMITTR-NDPHCV-----HQTTLWILQNLRSYSWDAKALITLAAFTLEYGNLQLNR-VTADTDLGNSL  
 -----**IP-VTG**---FKPDFPTLKLISQCMITTR-SAAHCV-----HQTTLWILQNLRSYSWDAKALITLAAFTLEYGNLHLR-VTADTDLGNSL  
**Group 1**  
 -----**IP-VTG**---FKPDFPTLKLISQCMITTR-SAAHCV-----HQTTLWILQNLRSYSWDAKALITLAAFTLEYGNLQLNR-VTADTDLGNSL  
 -----**IP-LAK**---YKPEFPTLKLISQCMITTR-GVVHCA-----HQTMMWILQHLRSFSWDAKALITVAAFSLEYGNFRHLQ--IPTSDQLGNAL  
 GmSE0-F1 **GKAS-QTI**---FQPEFRMKLISQCMITTP-HGERYV-----HQTTLRILQHLRSYSWEAKALVTLAAFALEYGNLHLSVETPENQLTNSL  
 MtSE0-F1 **SRAB**-----FQPEFRMKLISQCMITTP-HGERYV-----HQTTLRILQHLRSYSWEAKALVTLAAFALEYGNLHLSVETPENQLTNSL  
 MtSE0-F2 **TQIS**-----FKPDFSVLKRISQCMITTR-GTAECA-----HQTMMWVHLHLRGSWEAKALITLAAFALEYGNLHLSVETPENQLTNSL  
 GmSE0-F2 **AATTSVTS**---LKPDFPTLKLISQCMITTR-GTPECA-----HQTALRILQQLSGFSWDAKALIAVAFSLEYGEFVWLDLDR-VQAADQFGNSL  
 GmSE0u **AAASSVTS**---FKPDFPTLKLISQCMITTR-GTPECA-----HQTALRILQQLSGFSWDAKALIAVAFSLEYGEFVWLDLDR-VQAADQFGNSL  
 AtSE0a **KDYADHTS**---FETFADLIDQISCEIDCKLHGESHGMMTSGHLHDSRNTTTFVSLVSKYRWDKALVVLVLSALAVKYGVFLLLAE-THATNQLTKSL  
 SpSE0b **EKAPHSGLT**ELLNLYLAFIHRISMELISK-ANKEDA-----HSTMSLHSLTTYAWDTKVAITFAAFAQQYGEFGLLVH-QYTTDPLAKSV  
 SpSE0c **EKAPHSGLT**ELLNLYLAFIHRISMELISK-ANKEDA-----HSTMSLHSLTTYAWDTKVAITFAAFAQQYGEFGLLVH-QYTTDPLAKSV  
 GmSE0e **DSAYQSDLANVIDISYHTINKISCEICCKC-SSGGDV**-----HATTMGLGMLSSYSWDAKVVIALAAFAANFGEFVWLVQ-LYATNRLAKSV  
 SpSE0a **EKAS-LAFDGL**EGLAYIHKVSCELTCKCSSGGHDT-----HSTMSILGMLSGYQWDAKLVISLSAFAVTYGEFVWLVQ-MFATHPLAKSV  
 GmSE0c **MTAA-LAEFDM**LSLAYINKISCELSCKC-SGGGDA-----HSTMVLLNYMSSYAWHAKVVLTLAAFAVIFGEFVWLVQ-LSAENTLAKSV  
 GmSE0d **MTAA-LAEFDM**LSLAYINKISCELSCKC-SGGGDA-----HSTMVLLNYMSSYAWHAKVVLTLAAFAVIFGEFVWLVQ-LSAENTLAKSV  
 AtSE0b **DKLMQSSMMSV**LDVSVYAIIDRVACEIAYKS-LTGSDS-----HEITMSVFEHLSSFQWDAKLVTLAAFAFALNYGEFVWLVQ-FYSKNQLAKSL  
 GmSE0m **DRSRHPGHT**MLEALSADIRISCEISYKT-LNGVDA-----HSTTIAIFDMLTIYKWDVKLVLAALAFALTYGEFVWLVQ-IHDTNQLAKSM  
 MtSE0e **DRTHLPSY**TSMLEALSADIRISCEISYKI-LSGVDA-----HSTTVAIFEMLTIIYKWDVKLVLAALAFALTYGEFVWLVQ-IHDTNQLAKSM  
 GmSE0i **NDITTEIT**IGCSEPGGIITKIG-KVLCR-SGEGDI-----NSRIINFLFDLIGKYSWDAKVVLVFAFAVRYGEFVWLVQ-LYRGNALAAALI  
 MdSE0a **EKPP-KAT**---FSSPLCTLKSIGCEMSCKP-PGEEIA-----HKSTLAILNKLSYWEAKAVLAAFAFALEYGEFVWLVQ-TQQSDLLAKSV  
 MdSE0b **ENTP-KAG**---FSAPLCTLKSIASEMCKP-PSEEVA-----HNTTLAILNKLSYWEAKAVLTLAAFAFAMEYGEFVWLVQ-LQESDRLAKSI  
 MtSE0a **NINP-PAS**---FTSPLCTLKKINSEMACA-PGEEIA-----YRTTLAILNKLSYWEAKAVLTLAAFALEYGEFVWLVQ-YLPTDPLAKSL  
 MtSE0b **NINP-PAS**---FTSPLCTLKKINSEMACA-PGEEIA-----YRTTLAILNKLSYWEAKAVLTLAAFALEYGEFVWLVQ-YLPTDPLAKSL  
 GmSE0c **DKSL-IPN**---FSSPLCTLKSISSEMSCKP-PSEBIA-----HKTTLAILNKLSHYDWEAKAVLTLAAFALEYGEFVWLVQ-NLSTDPDLAKSV  
 GmSE0s **DKIP-Q**---FNSPLCTLQKISFEMSCCKP-PSEBEG-----HRTTLAILNKLSYWEAKAVLTLAAFALEYGEFVWLVQ-YQPTDPLAKSV  
 GmSE0g **DKIP-QAN**---FNSPLCTLQKIYSEMSCKP-QGEEIA-----HITTMALVKNLSYWEAKAVLTLAAFAFAMEYGEFVWLVQ-NQPTDPLAKSV  
 GmSE0r **DKIP-QAN**---FNSPLCTLQKIYSEMSCKP-PGEEIA-----HITTMALVKNLSYWEAKAVLTLAAFAFAMEYGEFVWLVQ-NQPTDPLAKSV  
 GmSE0l **EETDPLTS**---FQR-LPAMKRIACQMCTA-RGEQYA-----HQTMLILEQLRDYSWDAKAVIVLAAFALEFGKFWLQAH--I PRDKLQGSQ  
 GmSE0o **EEIN-ISS**---QQLTAKLRRIAYLMICTP-RGEHFG-----HRTTMLILEQLKHYSDAKAVLIVQAAFALEYGKIMYLPPTTQCGQQQIENLNF  
 GmSE0j **EDTT-ITS**---QQLTAKLRRIACQMCTA-RGDHYA-----HHTTMLILEQLKAYSWDAKALIVQAAFALEYGKFLYLPPL-TTQYQMSKSL  
 GmSE0p **EDTT-ITS**---QQLTAKLRRIACQMCTA-RGDHYA-----HHTTMLILEQLKAYSWDAKALIVQAAFALEYGKFLYLPPL-TTQYQMSKSL  
 MtSE0-F3 **DKVP-LSG**---YEPPIRKLKHISAQMMSTL-PGEEHA-----HMTTMSILDQLKSHWDAKALIAFAFALEYGNFWHLVQ-TPSGDHLGRSL  
 GmSE0a **DKVP-LST**---FDDPPFLKHLKHIASQMMNTP-HGEHHA-----HNTAMSILDQLRTYTWDAKALIAFAFALEYGNFWHLVQ-TPSGDHLGRSL  
 GmSE0f **DKVP-LST**---FDDPPFLKHLKHIASQMMNTP-HGEHHA-----HNTAMSILDQLRTYTWDAKALIAFAFALEYGNFWHLVQ-TPSGDHLGRSL

CgSE0a **KRLNQI**-----QHRQIPIIDINNSVVLVMEVVKIKINWGIWIA-EGYDTEDEV-----ALSDALQEIPLVVYVWVASLVACNSTFVGLSN  
 GmSE0-F3 **KRLNQI**-----QHRQLPVDINATVKLVMBAVEKIRRWGLSSDETYETEDVP-----ALSDALQLIPLVVYVWVASLVACNTNIQGVSN  
 GmSE0-F4 **ROLNQV**-----QNRNA---SAVGEVLMYVQVQPHINEWATYAA-DGYDEDEV-----DLTEAFQAILVVVYWSIASTVASTGNLIGVSN  
 LjSE0-F1 **ROLNQV**-----HTRKVP-ADITKLVTFIVHAFQHLKEMWATWAD-EGYDEEV-----SLTEALQHVPAVYVWVTAIAAVTGNLIGVSN  
 MtSE0-F4 **ROLNQV**-----QTRKIS-NDVTELVKYIVDMLIHLNVWATWSA-DGYDPEVDP-----ALTDALQEIPLVVYVWVTAIAVASTGNLIGVSD  
**Group 1**  
 -----**ROLNQI**-----QTRNIS-TDITELVSVFIVHQLLHLKEWATWSA-EGYDPEDEV-----ALTEALQEIPLVVYVWVTAIAVASTGNLIGVSD  
 -----**ROLNQI**-----QTRKIS-TDIPELVNFIVHKLHLKEWAAWSA-EGYDPEDEV-----ALTEALQEIPLVVYVWVTAIAVASTGNLIGVSD  
 -----**ROLNQV**-----NNGKLS-DDITELATVTVRVLQHLKEWAAWSA-AGYDTEDEV-----ALSDALQVIFPVVYVWVTAIAVASTGNLIGVSD  
 GmSE0-F1 **KQLNQV**-----QARK---NPGTTLVELVMEVVLHGIQEWRSRSG-LGYDIVEVP-----SLTDAQQEVFPVVYVWVTAIAVASTGNLIGVSE  
 MtSE0-F1 **KRLNQI**-----QNRKVT-VPATDLVELIMDVLHLHHEWATRSG-VGYNTLDVP-----SLSDALQDIPVAVYVWVTAIAVASTGNLIGVSD  
 MtSE0-F2 **KQLSQV**-----QFRKVP-ADITELVTFLLQVLDIKTAAWSA-FGYDLDVFN-----SLPDAMQVIFPVVYVWVTAIAVASTGNLIGVSE  
 GmSE0-F2 **KQLNQV**-----QTSRRVP-ADMTDLVTVLGEVLSYINLWAKWSA-MDYDTEAVH-----SLQAAMQEIPLVVYVWVTAIAVASTGNLIGVSE  
 GmSE0u **KQLNQV**-----QTSRRVP-ADMTDLVTVLGEVLSYINLWAKWSA-MDYDTEAVH-----SLQAAMQEIPLVVYVWVTAIAVASTGNLIGVSE  
 AtSE0a **ALLKQLP**SIPSRQNALHQRL---DKTRLMDQMDVLTFTIIDIYQLPP---NHITAAF-----TDHPTAVYVWVTRCVLIVSHISGASGPKQDQI  
 SpSE0b **AIIIMELPE**IMTRQDVLKQKF---DAIHDLIDKMLDVTKCIIEFRDVQT---SHNQHVITQLEMLINTAHISTAAVWTRAAVMCAAMILLNLIAGHEQI  
 SpSE0c **AIIIMELPE**IMTRQDVLKQKF---DAIHDLIDKMLDVTKCIIEFRDVQT---SHNQHVITQLEMLINTAHISTAAVWTRAAVMCAAMILLNLIAGHEQI  
 GmSE0e **AKLKHIE**TLERQVDDLGPKF---QTVNLLKAMLDVNTNIVQFHELPS---QYIDPEAP---EMLTASNLIIPGAVYVWVTRISIVSCASHLIGITGLGQGYM  
 SpSE0a **AIIKQLP**DIEMHGSLSRF---DAINELIKAILVEVKIIEFKKLPs---QYISEDQP---PLSVAITHIPTAVYVWVTRISIVSCASHLIGITGLGQGYM  
 GmSE0c **ALLKQLP**DIENFMSLKPHE---EALIRLVKAAMDVTMCIEFELKELPS---EYISEDTP---PMSVASTHIPIASYVWVTRISIVSCASHLIGITGLGQGYM  
 GmSE0d **ALLKQLP**DIENFMSLKPHE---EALIRLVKAAMDVTMCIEFELKELPS---EYISEDTP---PMSVASTHIPIASYVWVTRISIVSCASHLIGITGLGQGYM  
 AtSE0b **AMKLVP**--VQNRVTVLESVS---QGLNDLIREMKSVTACVVELSELDP---RYITPDVP---QLSRILSTIPIAVYVWVTRISIVSCASHLIGITGLGQGYM  
 GmSE0m **AIIKLLPS**IMEHGSLSLPRF---DTLNDLVNILEVTKCVIEFHDLP---QYITQDIS---AYTTAYNIPVAVYVWVTRISIVSCASHLIGITGLGQGYM  
 MtSE0e **AIIKQLP**GIEMHSSSLKPRF---DTLNDLVNILEVTKCVIEFHDLP---QYITQDIS---AYNTVSNHLPVAVYVWVTRISIVSCASHLIGITGLGQGYM  
 GmSE0i **SNIKQL**-----PNNLKPLKQIKALSLLVKTMDVAMCIIKFEYLPQHVPEGNDF---LVRDTKSRIEEAYVWVTRISIVSCASHLIGITGLGQGYM  
 MdSE0a **AIIKRV**PVLLKPTDLQKRRQAI-VELNVLIKTTLQVIECIFEKLSA---YDPKDV---ALAIAMDHIFVDDVYVWVTRISIVSCASHLIGITGLGQGYM  
 MdSE0b **AIIKRV**PVLLKPSDLHKKRQAV-LELNNLIKATLQVIECIDQDFKLS---YDPKDV---ALALAMDHIFVDDVYVWVTRISIVSCASHLIGITGLGQGYM  
 MtSE0a **AIIKRV**PVLLKPSDLHKKRQAV-LELNNLIKATLQVIECIDQDFKLS---YDPKDV---ALALAMDHIFVDDVYVWVTRISIVSCASHLIGITGLGQGYM  
 MtSE0b **AIIKRV**PVLLKPSDLHKKRQAV-LELNNLIKATLQVIECIDQDFKLS---YDPKDV---ALALAMDHIFVDDVYVWVTRISIVSCASHLIGITGLGQGYM  
 MtSE0c **AIIKRV**PVLLKPSDLHKKRQAV-LELNNLIKATLQVIECIDQDFKLS---YDPKDV---ALALAMDHIFVDDVYVWVTRISIVSCASHLIGITGLGQGYM  
 GmSE0s **AIIKRV**PVLLKPSDLHKKRQAV-LELNNLIKATLQVIECIDQDFKLS---YDPKDV---ALALAMDHIFVDDVYVWVTRISIVSCASHLIGITGLGQGYM  
 GmSE0g **AIIKRV**PVLLKPSDLHKKRQAV-LELNNLIKATLQVIECIDQDFKLS---YDPKDV---ALALAMDHIFVDDVYVWVTRISIVSCASHLIGITGLGQGYM  
 GmSE0r **AVLKGVP**VLTPAAVQKRRQAI-TELNNLVKATLLVIEFIEFELKLT---FDTKDV---ALLPAIEQIFVDDVYVWVTRISIVSCASHLIGITGLGQGYM  
 GmSE0l **AVLKGVP**VLTPAAVQKRRQAI-TELNNLVKATLLVIEFIEFELKLT---FDTKDV---ALLPAIEQIFVDDVYVWVTRISIVSCASHLIGITGLGQGYM  
 GmSE0o **AVLKGVP**VLTPAAVQKRRQAI-TELNNLVKATLLVIEFIEFELKLT---FDTKDV---ALLPAIEQIFVDDVYVWVTRISIVSCASHLIGITGLGQGYM  
 GmSE0p **ADLNGL**-----QSIMENIQHL-ANFNVLKVIQVVKCITDWMKMIT-AEYNVKDV---SLDTHLHEIPVAVYVWVTRISIVSCASHLIGITGLGQGYM  
 GmSE0q **ADLNGL**-----LMVPQNTQHL-PFVNSVVKAMQMCIECIEFELKLS---LGHDKDV---TLAETHQIFVDDVYVWVTRISIVSCASHLIGITGLGQGYM  
 GmSE0j **ADLNGL**-----LMIQHTQHL-TFFNSVVKVMQVIECIEFELKLS---AGYDIDV---TLAETHLHEIPVAVYVWVTRISIVSCASHLIGITGLGQGYM  
 GmSE0k **ADLNGL**-----LMIQHTQHL-TFFNSVVKVMQVIECIEFELKLS---AGYDIDV---TLAETHLHEIPVAVYVWVTRISIVSCASHLIGITGLGQGYM  
 MtSE0-F3 **ATMNRV**-----QSVDKNRQAI-ADYNSLVKNLLFAVEICIELEKLS---KGYEYKDV---ALSEAMQEIFVAVYVWVTRISIVSCASHLIGITGLGQGYM  
 GmSE0a **AQMSRV**-----HIVERNRQAV-ADYNSLVKNLLFAVEICIELEKLS---KGYDLDV---ALAEAMQEIFVAVYVWVTRISIVSCASHLIGITGLGQGYM  
 GmSE0f **AQMSRV**-----HIVERNRQAV-ADYNSLVKNLLFAVEICIELEKLS---KGYDLDV---ALAEAMQEIFVAVYVWVTRISIVSCASHLIGITGLGQGYM



Group 1

```

CgSE0a -----YTIP--DFSAKLAPALRELNRHLDI CKLQIDD--IEDYMSRKRN-----FRKPK-DVDFLKL LFN---RNGSSDAQVFD--GSAQTKVSV
GmSE0-F3 -----YALS--DFRGKLPALRDEPKHHEICEQQKAS--IEDYRNRKKA-----FKKPK-DIVDFLKL LLI---NQNGYKQSIYD--GNANRNVNV
GmSE0-F4 -----YKLS--EYTFRLSTAVNKLTMHLTKVKEQIAN--VRDYITIRNI-----FDRPK-DIVDLLKAL IYPQ--QKGAENPKIFE--GTNLVTKGI
LjSE0-F1 -----YNLQ--GYIDRLDEHVTKLAEQ LNSCKLQIGH--VDDYFNRRKI-----FDKPK-DIVDLLKAL IAH---RNGAQGGQIFE--GGVIVQQQL
MtSE0-F4 -----YKLS--AYKERLSRVVEELVKHLATCERQIRN--VDDLTSTRNN-----YRKP-K-DIVDCLKAL IH---RNGQDIPQIYQ--GNVQVQKSL
-----YKLS--EYRERLSGIVQKLVVHLNCKLQISY--IDDLFNRRKI-----FDKPK-DIVDCLKAL IH---RNGTDSPIYIE--GAIHVKTGL
-----YNLS--EYRERLSGIVQKLVVHLNCKLQISY--IDDLFNRRKI-----FDKPK-DIVDCLKAL IH---HNGADSPQIYI--GAIHVKTGL
-----YKLS--DFDKDLDRVVKTLNDHLDECKQIDV--IDNYNRRRKA-----FENPK-DIVDLLKL LLIH---SKGSPIPQIYD--GRTTKTDI
GmSE0-F1 -----YKLA--DFDLRLSSAADKPKKHELKS SVVQKGY--ADENYKRKA-----FSNPK-DIVEFLKL LLIQ---HNGSKV-QIYD--GSIKTKTDI
MtSE0-F1 -----YTLS--DFKEKLNFDVSKLKEHLKLSKWQIDS--VEEYLKRKA-----ISNPK-DIIDFLKL LLIQ---RNGDNL-LIYD--GTTNKTDI
MtSE0-F2 -----HKLS--DYVKSLSDVVKELRRHLKSCLEIGK--IHENENLLKD-----SDNIK-DVVAFLRL LLIK---NGTDQIPPIFI--GNDQVKTGI
GmSE0-F2 -----HKLS--AYKERLEFIFPKLQFHLENCRVEIGR--IQDYHIRNIR-----YPKLK-DVVELLDIL IIPGSDNGTSPKIFE--GGVLIKNGI
GmSE0u -----HKLS--AYKERLEFIFPKLQFHLENCRVEIGR--IQDYCFRNTIR-----YPKLK-DVVELLDIL IIPGSDNGTSPKIFE--GGVLIKNGI
AtSE0a -----MSFM--EVS EIH-ENSERLRKINAYLLEQFKKSKMTIEEGIEEYQELIQT--FTTII--HVDVVP LLL---RLLRPIDFLYHAGVSKRRVGI
SpSE0b -----SSTS--EAWELS--SLTHKLANILDHLRKKVLDLCHQKIEEKRQHDAPFALLRL-----LRTPHIDNMKIL SILLI---HSRDNDLPLFD--GTHKRRVGL
SpSE0c -----SSTS--EAWELS--SLTHKLANILDHLRKKVLDLCHQKIEEKRQHDAPFALLRL-----LRTPHIDNMKIL SILLI---HSRDNDLPLFD--GTHKRRVGL
GmSE0e -----TSTT--ETWELS--SLAHKLDNINSHLRKQLTVCRQHDDNRQEFATLRL-----FETPHQDNSKVLKAMF-----CSKDDPLPLFD--GSSKQRVSI
SpSE0a -----VASTA--DTWEMS--SSTHKLKNISEHLRABELNRCYQHIDKMHIEYFQMLVHL-----FEATQFDNMKIMRAMI-----YIKDDLPLEV--GTTHTRASV
GmSE0c -----SSTT--EAWELS--SLAHKVS SSIYEHKLNQVLVLCYQYIDDKRHIEAFNLRL-----FETVHVDNMKILRALI---YAKDDVPLVD--GTTKSRVSL
GmSE0d -----SSTT--EAWELS--SLAHKVS SSIYEHKLNQVLVLCYQYIDDKRHIEAFNLRL-----FETVHVDNMKILRALI---YAKDDVPLVD--GTTKSRVSL
AtSE0b -----NTQM--DLWETS--MLANKLKNIHDLAETLRLCYRHIEKRQSS ESKVLHSL-----FDTHIDNMKIL TALV---HPKPHITPLQD--GLTKRKHVHL
GmSE0m -----TST--DAWELS--TLIFKLNIVDHLRQLLNSCHEHIGKMDAEAYQMLREL-----FSKPHTDNMKVLKALI---YAQDDILPLYD--GVTKKRVSL
MtSE0e -----TSN--DAWELS--TLAFKLR SIVDHLRKLQLDICKIHVEEAMDT EAYGMRLREL-----FLTPTHIDNMKIIKALI---YSHDDILPLYD--GVSKKRASL
GmSE0i -----YSDSAIIAAWELS--SLAYRLSGICCNLRRQVDLCHKELER-----NLYDRLLDL-----AR EENIDNQKTLTLF-----FPSKNYPLKLD--CSTEVKLRG
MdSE0a -----YDLS--QFAQKIHYILNKLKIQLLICKQIEE--AETRYKRRLK-----FQTPA-EVMEVFKALI---FTKDTVQPIID--GSTNKTVSI
MdSE0b -----HDLA--PFAQKITHYVLNKLKIQILVCRQIIEE--AETRYRRLKI-----FRTP-T-EIMEVFKALI---FTKENVPLVD--GSTKMVVKI
MtSE0a -----QDLS--QFGQKINI IISKLRKHVSQITIQIDE--AEYNKLLKLL-----FQTP-T-EIMEVFKAL IFLV---WKDTPQPIYI C--GSTKTLVNI
MtSE0b -----QDLS--HFGQKINI IISKLRKHVSQITIQIDE--AEYNKLLRKL-----FQTP-T-EIMEVFKAL IFLV---WKDTPKAPIYD--GSTKTLVNI
GmSE0c -----QELS--HYGQKINI IISKLRKQITVCRQIIDT--AKYIQELKLL-----LQTP-T-EITVVL SFLI---GATKTTVDI
GmSE0s -----QELS--HYGQKINI IISKLRKQITLCRQIIDE--AQYVRLKRF-----FQTP-T-EIMEVFKAL IFLV---FNKDAPQLFD--GATKTKVDI
GmSE0g -----QDLS--HYGQKINI IISKLRKQIMLCRQIIEE--AEYHRLRKF-----FQTP-T-EIMEVFKAL IFLV---YKDPAPQLLPH--GATKTTVEI
GmSE0r -----QDLS--HYGQKINI IISKLRKQIMLCRQIIEE--AEYHRLRKF-----FQTP-T-EIMEVFKAL IFLV---YKDPAPQLLPH--GAAKTTVEI
GmSE0l -----YDLS--KFDYKDFILKPKDHDCKSTQIGQ--IEDYRRRDI TSIQTDTQI--DIVKFL EALII PS--YSQDSRP IYVN---GLTGFQVAL
GmSE0o -----HELKSFEPKLD S I LKGFKEFLERCSKEIVR--IEDYTRREKIV-----IHTGK-NIVKVLKAL IISR--ENRDLRQNVFN---VLTGEQVKI
GmSE0j -----HELKSNFENKLDLILRNFKHEHEMCGREIGR--IEDYTRRNIV-----IHTGK-DIVKVLKAL IISG--ENRESRQSVFN---VLTGEQIKI
GmSE0p -----HELKSNFENKLDLILRNFKHEHEMCGKEIGR--IEDYTRRNIV-----IHTGK-DIVKVLKAL IISG--ENRESRQSVFN---ILTGEQIKI
MtSE0-F3 -----YELS--SYDVKLASIVSKLKAHLTRSRKHIGE--LEDYWRKKL-----LQTP-T-EIVEVLKAL IFLV---HNEIQDPLVFD--GLNRQMVSI
GmSE0a -----YEIA--NFDDKLA AVISK LKANLTRSRKKIGD--LEDYWRKKL-----LQTP-T-EIVEVLKAL IYI---HNEVHDPHVYD--GITRQMVSI
GmSE0f -----YEIA--NFDDKLA AVISK LKANLTRSRKKIGD--LEDYWRKKL-----LQTP-T-EIVEVLKAL IYI---HNEVHDPHVYD--GLTRQMVSI

```

### Motif 7

Group 1

```

CgSE0a E-VFKQKHVLLFIS--TL-DSIAD EIRLLNSINDRLVEDPNDK-TG-FKKEEFKILWVPIVDR-----WD-DIR--KEVL-KSFK-NGIKWYVLEYTS-PL
GmSE0-F3 E-VFKKHYVLLFIS--GL-DRIEDEIRLLNSIYERLVEDPNDK-SG-FKKEEFKILWPIENK-----WG-DAR--RELF-NLTK-SDIKWYVVEYAQVPL
GmSE0-F4 E-VFRQKHVLLFIS--GL-DSIEDEISLLNSIYERLQEDPREA-KG-FKKEEFKILWPIVVR-----WS-QSS--REQF-KALK-SGPKFYAVEYFF-EL
LjSE0-F1 E-VFRQKHVLLFIS--GL-NSIVDEI LLLNSIYNRLQDNPT EVIKGF-FKKEEFKILWVPMVDR-----WD-EAS--REQV LNTWK-RGIKWYVVEYFF-EL
MtSE0-F4 E-VFKQKHVLLFIS--SL-DRIQDEITLLNSIYERLQENPKES-KG-FKKEEFKILWPIVVK-----WD-DIQ--IENF-KALK-SGIKWYVVEYFS-EL
-----VFRNKHVLFIS--SL-DSIEDEISLLNSIYERLQENSKESIKG-FKKEEFKILWPIVNM-----WD-DIR--KERF-RALK-SGIKWYAVEYFF-EL
Group 1 E-VFRHKHVLMFIS--SL-DSIEDEISLLNSIYERLQENSKESIKG-FKKEEFKILWPIVNM-----WD-DIR--KERF-RALK-SGIKWYAVEYFF-EL
-----VFKQHYVLLFIS--SL-DSIDDEIRLLNSIYDRLEKDPKEV-KG-FKKEEFKILWPIVDS-----WD-KDS--VEKY-KTLK-TKIKWYAVEFLS-LV
GmSE0-F1 E-VFNQHYVLLFIS--SL-DKIEDEISLLNTIHDRLQENPNEVKN-YKKGDFKILWPIVDT-----WD-DIQ--KHKF-NILK-NTIKWYAVEFFT-EL
MtSE0-F1 E-VFKDHYVLLFIS--SL-NKVDD EILLNSIHDRLQDNQVVI-KG-YKKEEFKILWPI-----WDVDIQ--KIKF-DSLK-NKIRFYAVDYFS-EL
MtSE0-F2 E-VFKKHVLLFVS--GL-DTLRDEI LLLNSIYKRLQDKPEVLKGSFKKEEFKILWPIVNR-----WD-EDR--KKEF-KNLK-ESMKWYVLEHFS-EL
GmSE0-F2 E-VFKQHYVLMFFS--SL-DSIGDEI LLLNSINNGLOENPGEIEKG-FKKGDFKILWPIVDD-----W-KSK--REQF-TNLK-EKIKFYLVEYFE-EL
GmSE0u E-VFKQHYVLMFFS--SL-DNIGDEI LLLNSINNGLOENPGEIEKG-FKKGDFKILWPIVDD-----W-KTT--REQF-NNLK-EKIKFYLVEYFE-KL
AtSE0a N-VLTQKHVLLLS--DL-ENIEKELYILLESYTE-----AWQSF EILWVVPVQDF-----WT-EAD--DAKF-EALH-AAMRWYVLEBPR-KI
SpSE0b D-VLRRKHVLLLS--DL-DIAP EELFILHMYAESKTQPN-----RPS ESYVWVIVPVVDKRLSPWT-EAK--QMKF-EVQ-ASMFWYVAHPS-MI
SpSE0c D-VLRRKHVLLLS--DL-DIAP EELFVLHMYDESKTQPN-----RPS ESYDVWVIVPVVDKRLTPWT-EAK--QMKF-EVQ-ASMFWYVAHPS-MI
GmSE0e E-VLRRKIVLLYIT--DVHNVDPQELVIFEQMYQESRQDST-----RLESQYELVWIPVVDK-AIPWN-DV---KPKF-EKLQ-SMMSCYSLYDPS-LL
SpSE0a E-VLRRKTVLLLS--DL-EASHEEILVLSQIYLESRRPE-----FQ-----YEVWLPVDR-SKGWN-DAQ--EQKF-KELQ-ALMPWYTLHHS-LL
GmSE0c E-VLRRKHVLLLS--DL-DLSQEEI LVLVDNLYKDARA-----RGDTHEYEMVWIPVVDK--ATWN-ETS--KQKF-EYLQ-SLMAWYSVYDF-II
GmSE0d E-VLRRKHVLLLS--DL-DLSQEEI LVLVDNLYKDARA-----RGDTHEYEMVWIPVVDK--ATWN-DMS--KQKF-EYLQ-SLMAWYSVYDF-II
AtSE0b D-VLRRKTVLLLS--DL-NILQDELSIFEQIYTESRRNLVGV-DG-KSHMPYEVVWVVPVVDP-IEDFE-RSPILQKRF-EDLR-DPMFWYSVDSFK-LI
GmSE0m E-VLRRKNVLLLS--GM-EISTDEI LLEQIYNESKAHAP-----RMS ERYELVWIPVVDP-NSEWI-EPK--QKQF-ESLQ-ESMSWYSVYHPS-LI
MtSE0e E-ALRRKHVLLLS--GL-EFSTDEI LLEQIYNESKAHAP-----RQDNQHKLVWIPVVDK--TSEWT-DQK--QMCF-ENLR-ESMFWYSVYHPS-LI
GmSE0i S-ELKKNKTVLLLSKQP LNP IDIYLLVQQTCDDHPLNE-----RLRESYKIVWIPVPS--DTWT-EAE--ESSF-NFMS-DSLFPWNAVRRKPR-LL
MdSE0a D-VLRRKYVLLFIS--TL-DISDDDISIVKPVYEGT-----KKDDKYKIVWIPVVEQ-----WT-DDL--RKKF-EVLR-AKMPWYTVQYFA-PV
MdSE0b D-ILRRKNVLLFIS--SL-DISDDDISILKPIYDMI-----KKDNQHKLVWIPVVEH-----WT-DDR--RKKF-EVLR-AKMPWYTVQYFA-PV
MtSE0a D-VLKKKDVFLFIS--TL-DICQEDISTMIRIYDHIQ-----KTGSQHQIVWIPVVEE--WN-DRG--RKKF-DSLK-SKMPWYVLLHFA-TI
MtSE0b E-VLKKKDVFLFIS--TL-DISQEDISILPIYDHIK-----KTGSQHQIVWIPVVEE--WN-DKL--KQKF-DSLK-SKMPWYVLLHFA-PI
MtSE0c NVLKKKIVLVFVS--TL-DVTEEBEITAVRSVYESI-----KTNEQYKIVWIPVVEE--WN-EQL--RKKF-DSLK-SKMPWYVQVHG-NI
GmSE0s T-VLKKKNVYLFIS--SL-DITEEBEISVLRPVYDSI-----KTNDQYKIVWIPVVEE--WT-EQL--HKKF-EVLR-SKMPWYVQVHSG-TI
GmSE0g T-ELKKKHVLLLS--TL-DITEEBEISVLPVYDSI-----KTGQYKIVWIPVVEE--WN-EML--HKKF-EFLK-SKMPWYVQVHSG-AI
GmSE0r T-ELKKKHVLLLS--TL-DITEEBEISVLRPVYDSI-----KANDQYKIVWIPVVEE--WT-EKL--HKKF-EFLK-SKMPWYVQVHSG-PI
GmSE0l G-EFKKHVLLFIS--GL-DHIDNEIQLLKSINAKLKEEPNEL-EG-YRKEEFKILWIPVSV-----WD-BEQ--KKKL-DV---TKVEWYVVEKFN-FQ
GmSE0o E-EFK-KYVLLFIS--GL-DKIEDEIRLLKSIEKLEKPREV-EG-YRKEEFKILWIPVDE-----WN-EER--RKKLESHLQCNKFGWYVVKYFN-FE
GmSE0j E-EFKKHVLLFIS--GL-DSIEBETLLKSIEKLEKPREV-EG-YRKEEFKILWIPVDE-----WN-EER--RKTLETKLQRTKFGWYVVKHFS-FE
GmSE0p E-EFKKHVLLFIS--GL-DSIEBETLLKSIEKLEKPREV-EG-YRKEEFKILWIPVDE-----WN-EER--RKTLETKLQRTKFGWYVVKHFN-FE
MtSE0-F3 E-VFRKHVLFIS--GL-DSIRDEIRLLQSIYVGLQEDPREL-KG-YRKEEFKILWIPVDD-----WT-LLH--KAEF-DNLK-LEMFWYVVEYFF-PL
GmSE0a E-VFRKHVLLFIS--GL-DSIRDEIRLLQSIYVGLQEDPREV-KG-YRKEEFKILWIPVDE-----WN-LLH--RABY-DNLK-LEMFWYVVEYFF-PL
GmSE0f E-VFRKHVLLFIS--GL-DSIRDEIRLLQSIYVGLQEDPREV-KG-YRKEEFKILWIPVDE-----WN-LLH--RABY-DNLK-LEMFWYVVEYFF-PL

```



Motif 8

Motif 2  
(Rüping et al. 2010)

CgSE0a **PGIRLIR--EDLNFNQ--KPIVPPVNP-HGIVINDDAMDIFEWGIDAFPPFRKSDGDLAQQW--KWFWDVGGK-TNLDIQ--VKGDR-YIFIFGGND**  
 GmSE0-F3 **PGIRLIE--EDLRFHG--KPIIPVVKP-QGVLLNDALDIFEWGIDAFPPFRKSDAYLLAQQW--KWFWDVGGKKTNLHGIQ--VKGDR-YIFIFGGSD**  
 GmSE0-F4 **PGLKIIKPTERLNYEI--QPIAPLFS--KGTLLNGNALEVIPEWGIIDAFPPFRKIDGDELTKQW--KWLWDVTKK-ATPGLQ--VKENR-YIFIFGGAN**  
 LjSE0-F1 **PGRRITDPERLGYEG--NPIIPVFN--QGMILTNDAMDILFQWGIIDAFPPFRKSDGIDLTQW--KWLWDVTKK-ATPGLQ--VKVDR-YIFIFGSEN**  
 MtSE0-F4 **PGLKIIKDPPELLIGYID--NPIIPVFN--KGIITNEDAMDILFQWGIIDAFPPFRKSDGNDLKLKW--NWLWDVTKK-ATPGLL--VKVDR-YIFIFGGFN**  
 --- -- --  
 GmSE0-F1 **PGHRIITDPERIGYIG--NPIIPVFN--QGYITNIDAMDILFQWGIIDAFPPFRKSDGIDLTQW--KWLWDVTKK-ATPGLQ--VKGDR-YIFIFGGFN**  
 Group 1 **PGHRIITDPERIGYIG--NPIIPVFN--HGYITNIDAMDILFQWGIIDAFPPFRKSDGIDLTQW--KWLWDVTKK-ATPGLQ--VKGDR-YIFIFGGFN**  
 --- -- --  
 GmSE0-F1 **PGIRLVR--EVLKFEF--KPIIPVISP--QGKRINDNAMDIFEWGIDAFPPFRKEDGDLTQKW--KWFWDVTKK-VNPAIQ--VEPEE-YIFIFGGFD**  
 MtSE0-F1 **PGTDLIK--EKFNLYG--KPIAPVLTLP--LGDRMNEEDAMDILFQWGIIDAFPPFRKIDGIDLTQW--KWFWDVTKK-ANLGIQQ--VTGDR-YIFIFGGAD**  
 MtSE0-F2 **PGIRLIR--EHLNYS--KPIIPVLS--LGEKMNDDAMDILFQWGIIDAFPPFRKQDGYDLTQKW--KWFWDVTKR-VNLGIQ--VKGDR-YIFIFGGSD**  
 MtSE0-F2 **PGRGIK--KKLNYDIGYPPILAVIN--QGDIIKNDAMEIIFEWGIDAFPPFRISDAEDIFKKW--EWFWKLTKK--VDVNIK--MSWDR-YIFIFGGND**  
 GmSE0-F2 **PGYDIIM--DKFKYEG--LPIVSVVNP--QGMIMNENALQIIFEWGIDAFPPFRSDVYDNLKKW--KWFWNLEQ--TDDNAKRLGKNTSYAFIYGGND**  
 GmSE0u **PGYDIIV--DKFKYEG--LPIVSVVNP--QGMIMNDNAMQIIFEWGIDAFPPFRSDVYDNLKKW--KWFWNLEK--TDDNAKRLGKNTSYAFIYGGND**  
 AtSE0a **RRAIRFVR--EWWGFKN--RPILVALDP--KGVMSNAPFMVWIWQFAHFFPTTAREDLWSEQ--EWNLEFLDGTDPHSLNQLVDGK-YICLYGGED**  
 SpSE0b **DDAVIRCIK--EVMGFKK--KPQLVLDLP--QGEANNAYHMLWIWGLAFPPFKAREEALWKEQ--TWNIELLADSIDQNIFTWISSEK-CICLYGGED**  
 SpSE0c **DDAVIRCIK--EVMGFKK--KPQLVLDLP--QGEANNAYHMLWIWGLAFPPFKARETALWKEQ--TWNIELLADSIDQNVFTWISSEK-CICLYGGED**  
 GmSE0e **EPATIRYIK--EVLWFKT--KPILVLDLP--QGVVNLNAIPMMWIWGLAFPPSSSRBEALWNAE--TWGLVLLADSIDPSSLEWISSEK-YICLYGGED**  
 SpSE0a **EPATIRYIK--EVLWFKT--KPILVLDLP--QGVVNLNAIPMMWIWGLAFPPSSSRBEALWNAE--TWGLVLLADSIDPSSLEWISSEK-YICLYGGED**  
 GmSE0c **EPATIRYIK--EVLWFKT--KPILVLDLP--QGVVNLNAIPMMWIWGLAFPPSSSRBEALWNAE--TWGLVLLADSIDPSSLEWISSEK-YICLYGGED**  
 GmSE0d **EPATIRYIK--EVLWFKT--KPILVLDLP--QGVVNLNAIPMMWIWGLAFPPSSSRBEALWNAE--TWGLVLLADSIDPSSLEWISSEK-YICLYGGED**  
 AtSE0b **ERHVVFMR--GRWHFMN--KPILVLDLP--QGEANLALHMIWGLAFPPFKAREEALWKEQ--TWNIELLADSIDQNIFTWISSEK-CICLYGGED**  
 GmSE0m **GKPVVFIQ--REWKYK--KPILVLDLP--QGRVSCPNAIHMMWIWGLAFPPSSSRBEALWKEE--TWRLLELLVDDIDPTEILNWKDGGK-YIFIFGGDD**  
 MtSE0e **SKAVVFIQ--SEWKYK--KPILVLDLP--QGRVSCPNAIHMMWIWGLAFPPSSSRBEALWKEE--TWRLLELLVDDIDPTEILNWKDGGK-YIFIFGGDD**  
 GmSE0i **SSAVVYK--EQWNYK--EPIMVALDS--KGVNTYNALDMMIWIWGLAFPPFKAREEALWKEQ--TWNIELLADSIDQNIFTWISSEK-CICLYGGED**  
 MdSE0a **--AGVRFIK--EWHFKG--KPAVVVMPN--QGVVENTNALLHILHMGKAFPPFKAREEALWKEQ--TWNIELLADSIDQNIFTWISSEK-CICLYGGED**  
 MdSE0b **--AGVRFIK--EWHFKG--KPAVVVMPN--QGVVENTNALLHILHMGKAFPPFKAREEALWKEQ--TWNIELLADSIDQNIFTWISSEK-CICLYGGED**  
 MtSE0a **--AGVRFIK--EWHFKG--KPAVVVMPN--QGVVENTNALLHILHMGKAFPPFKAREEALWKEQ--TWNIELLADSIDQNIFTWISSEK-CICLYGGED**  
 MtSE0b **--AGVRFIK--EWHFKG--KPAVVVMPN--QGVVENTNALLHILHMGKAFPPFKAREEALWKEQ--TWNIELLADSIDQNIFTWISSEK-CICLYGGED**  
 GmSE0c **--AGVRFIK--EWHFKG--KPAVVVMPN--QGVVENTNALLHILHMGKAFPPFKAREEALWKEQ--TWNIELLADSIDQNIFTWISSEK-CICLYGGED**  
 GmSE0s **--AGVRFIK--EWHFKG--KPAVVVMPN--QGVVENTNALLHILHMGKAFPPFKAREEALWKEQ--TWNIELLADSIDQNIFTWISSEK-CICLYGGED**  
 GmSE0g **--AGVRFIK--EWHFKG--KPAVVVMPN--QGVVENTNALLHILHMGKAFPPFKAREEALWKEQ--TWNIELLADSIDQNIFTWISSEK-CICLYGGED**  
 GmSE0r **--AGVRFIK--EWHFKG--KPAVVVMPN--QGVVENTNALLHILHMGKAFPPFKAREEALWKEQ--TWNIELLADSIDQNIFTWISSEK-CICLYGGED**  
 GmSE0l **--AGVRFIK--EWHFKG--KPAVVVMPN--QGVVENTNALLHILHMGKAFPPFKAREEALWKEQ--TWNIELLADSIDQNIFTWISSEK-CICLYGGED**  
 GmSE0j **--AGVRFIK--EWHFKG--KPAVVVMPN--QGVVENTNALLHILHMGKAFPPFKAREEALWKEQ--TWNIELLADSIDQNIFTWISSEK-CICLYGGED**  
 GmSE0k **--AGVRFIK--EWHFKG--KPAVVVMPN--QGVVENTNALLHILHMGKAFPPFKAREEALWKEQ--TWNIELLADSIDQNIFTWISSEK-CICLYGGED**  
 GmSE0p **--AGVRFIK--EWHFKG--KPAVVVMPN--QGVVENTNALLHILHMGKAFPPFKAREEALWKEQ--TWNIELLADSIDQNIFTWISSEK-CICLYGGED**  
 MtSE0-F3 **--AGVRFIK--EWHFKG--KPAVVVMPN--QGVVENTNALLHILHMGKAFPPFKAREEALWKEQ--TWNIELLADSIDQNIFTWISSEK-CICLYGGED**  
 GmSE0a **--AGVRFIK--EWHFKG--KPAVVVMPN--QGVVENTNALLHILHMGKAFPPFKAREEALWKEQ--TWNIELLADSIDQNIFTWISSEK-CICLYGGED**  
 GmSE0f **--AGVRFIK--EWHFKG--KPAVVVMPN--QGVVENTNALLHILHMGKAFPPFKAREEALWKEQ--TWNIELLADSIDQNIFTWISSEK-CICLYGGED**

CgSE0a **SKWIHDFTLAVDKVKRH-----ETIKRADAIIDYQLGK-----DDPKVPRFWIGIESKR-QKK-----H-----YEK**  
 GmSE0-F3 **KWTRFETVAVDKIKRH-----DTIRRADAIIDYHLGK-----DDPKVPRFWIGIESKR-QKK-----H-----SEN**  
 GmSE0-F4 **NWVQNFQTQELSKIKMN-----QSIQRADIIIDYQLGK-----ELNNSVPSFWIGVERKK-QNKK-----H-----QEA**  
 LjSE0-F1 **NKWIQDFTELDLKRKN-----ETVKKRADVIIIEQYQLGK-----DDPNRVPFWMGVERKK-QNKK-----H-----QEA**  
 MtSE0-F4 **KWIQDFTELEKIKRH-----ETIKRADVIIIEQYQLGK-----DDPNRVPFWMGVERKK-QNKK-----H-----QET**  
 --- -- --  
 GmSE0-F1 **KWIQDFTELEKIKRH-----ETIKRADVIIIEQYQLGK-----EDPNRVPFWMGVERKK-QNKK-----H-----QEA**  
 Group 1 **KWIQDFTELEKIKRH-----ETIKRADVIIIEQYQLGK-----DDPNRVPFWMGVERKK-QNKK-----H-----QEA**  
 --- -- --  
 GmSE0-F1 **KWIQDFTELEKIKRH-----ETIKRADVIIIEQYQLGK-----DDPNRVPFWMGVERKK-QNKK-----H-----QEA**  
 MtSE0-F2 **KWIQDFTELEKIKRH-----ETIKRADVIIIEQYQLGK-----DDPNRVPFWMGVERKK-QNKK-----H-----QEA**  
 MtSE0-F2 **KWIQDFTELEKIKRH-----ETIKRADVIIIEQYQLGK-----DDPNRVPFWMGVERKK-QNKK-----H-----QEA**  
 GmSE0-F2 **KWIQDFTELEKIKRH-----ETIKRADVIIIEQYQLGK-----DDPNRVPFWMGVERKK-QNKK-----H-----QEA**  
 GmSE0u **KWIQDFTELEKIKRH-----ETIKRADVIIIEQYQLGK-----DDPNRVPFWMGVERKK-QNKK-----H-----QEA**  
 AtSE0a **MQWIKNFTSLWRNVAKAANIQLEMVYVKG-----RN-PKNGIQIINTIREENLSHTL-----PDLQIWFVWTRVRESMW-ESKQRLMKAHGKIGREGFKEE**  
 SpSE0b **IEWIRSFATSATRAVANAARVPLEMLYVKG-----KN-PKERVRKNSSIQMENLSHVV-----QDQTLIWFVWTRVRESMW-HSRTQQ-----D-----IPG**  
 SpSE0c **IEWIRSFATSATRAVANAARVPLEMLYVKG-----KN-PKERVRKNSSIQMENLSHVV-----QDQTLIWFVWTRVRESMW-HSRTQQ-----D-----IPG**  
 GmSE0e **IEWIRKFTNTAYSARLQLPLEMLYVKG-----SN-PGKRVQELINNAVQTEKLSNVL-----PDLAISWFFVWTRVRESMW-HSKSQ-----S-----KTV**  
 SpSE0a **MDWIRNFTKSARSVAQRAGIDLQMLYVKG-----SN-NKERVRNINSMITAENLSYCL-----MDLTSVWVWTRVRESMF-YSKMQL-----G-----KTI**  
 GmSE0c **LEWIEKFTTATAISVAKAGKFELEMAYVKG-----SN-AKERMQMIKTFTTRKFSYFW-----PNVTSIWFVWTRVRESML-YSKLQH-----G-----RTV**  
 GmSE0d **LEWIEKFTTATAISVAKAGKFELEMAYVKG-----SN-AKERMQMIKTFTTRKFSYFW-----PNVTSIWFVWTRVRESML-YSKLQH-----G-----RTV**  
 AtSE0b **LDWIRRFMAAKATAKDSNVNLEMAYVGR-----NHSREQVIRRISEVIRSENLSHW-----AEPALMFWFVWTRVRESML-YSKIQL-----G-----KAD**  
 GmSE0m **PEWVRRFVKEARRVATATQIPEMLYVKG-----SNKREQVQKIITDIRKDLQYVW-----SEQSMIWFVWTRVRESML-FSKLQL-----K-----QTD**  
 MtSE0e **PEWIKRFVKEARKVAQATRTPEMLYVKG-----SNKRDQVQKCDTIREKLYTHSW-----SEQSMIWFVWTRVRESML-FSKIQL-----K-----QVD**  
 GmSE0i **LWVIQQFNDKITEIKRA-GLQLETIYVGNSSQSGENV-KQIMARCGE-----KSLSDP-----LSFTNVQHFVWTRVRESML-RSKLRL-----G-----KTF**  
 MdSE0a **NDWIQQFTTKATTIAND-----PIKELKINIELFCVGSKPKGGEDLGLGRFVNGIESLF-FTKV-----N-----KQ**  
 MdSE0b **NGWIQQFTTKATATAND-----PIKELKINIELFCVGSKPKGGEDLGLGRFVNGIESLF-FTKV-----N-----KQ**  
 MtSE0a **KEWIQQFTTKYFAGALVND-----ATIKQNTSIELCLLES-----QQQNVNTFKKVESLF-VTKM-----H-----EK**  
 MtSE0b **KEWIQQFTTKYFAGALVND-----ATIKQNTSIELCLLES-----QQQNVNTFKKVESLF-VTKM-----H-----EK**  
 MtSE0c **KEWIQQFTTKYFAGALVND-----ATIKQNTSIELCLLES-----QQQNVNTFKKVESLF-VTKM-----H-----EK**  
 GmSE0s **KDWIQQFTTKYFAGALVND-----ATIKQNTSIELCLLES-----QQQNVNTFKKVESLF-VTKM-----H-----EK**  
 GmSE0g **KEWIRHFTTKYATAFAND-----AALKDAKIHIELFCVEK-----EDKSFLRRFVWTRVRESML-YSKIQL-----G-----NT**  
 GmSE0r **KEWIRHFTTKYATAFAND-----AALKDAKIHIELFCVEK-----EDKSFLRRFVWTRVRESML-YSKIQL-----G-----NT**  
 GmSE0l **TKWIQQFTTAVEKLLKN-----ETLTEREETIIESYQLGR-----DSPKIVPRFWITIDNLLASRKLTKK-----G-----SEQ**  
 GmSE0o **TKWIQQFATAIETLKR-----VAKLKLNTTIESYQLGK-----DDPKAIPHFWIAIDSL-TRRQK-----H-----KKG**  
 GmSE0j **AMWIQQFTTAVEKLLKN-----VDSISLQDITIESYQLGR-----EDPKVPRFWIAIDSL-ANRQQMMKGG-----D-----DQ**  
 GmSE0p **IMWIQQFTTAVEKLLKN-----VDSISLQDITIESYQLGR-----EDTKVPRFWIAIDSL-ASRQQMMKGG-----D-----DQ**  
 MtSE0-F3 **PKWQDFALAEIKIKRH-----ETIKRADAVIEHFFHGK-----EDKRIVPRFWIGIESLF-ANMI-----H-----QKK**  
 GmSE0a **KKWLQDFATQVVEKIKRH-----ETIKRADAVIEHFFHGK-----EDKRIVPRFWIGIESLF-ANMI-----H-----QKT**  
 GmSE0f **KKWLQDFATQVVEKIKRH-----ETIKRADAVIEHFFHGK-----EDKRIVPRFWIGIESLF-ANMI-----H-----QKT**

## Motif 9

CgSE0a IDCEIQEIVKSLCLKQDIQGWAILSKG--SNVKILGHGEPMYQTIAEFEL-WKENVLVKEGFDIAFKGYEYET--KLKDLPATPQPQAFMNV--DNY-T  
 GmSE0-F3 IDCEIQEIIIRSLCLKQDPLGWAILSKG--SNVRILGHGQPMYQTIVADFEK-WKERVLVKEGFDIAFQYDYD--QRDLPA-PQPCEFNIL-----  
 GmSE0-F4 VDCEIQIVKCLFCLKRDPQGWAILSKG--HNKHLGHGQAVYQTVAEFQW-NKEKVFEREKGFDAFKEYYDA--KEKEISD-TQPCEBY-----TS-A  
 LjSE0-F1 VDCEIQEIVKSLFCLKRDPQGWAILSKG--HNKLLGHGSAVYQTVVVEFQW-NKEKVLEREKGFDAFKEYYDI--KAKEISA-RQPCEIINV--DSY-S  
 MtSE0-F4 VDCKIQEIVKDLFCLRRDPQGWAILSKG--HSIKLLGHGEPAYQTLVFEFQW-WKDKVLEKEGFDIAFKEYYQM--KAKEISG-REPCVILNV--DTY-S  
**Group 1**  
 CEIQDIVKSLFCLKRDPQGWAILSKG--QNIKLLGHGEPAYQTLAEFQW-WKDRVLEKEGFDIAFKEYYEM--KAKELSG-RQPCEVNVV--DTY-S  
 CEIQDIVKSLFCLKRDPQGWAILSKG--QNIKLLGHGEPAYQTLAEFQW-WKDRVLEKEGFDIAFKEYYEM--KAKELSG-REPCVNVV--DTY-S  
 CQIQTIVKSLCLKRDPQGWAILSKG--NNVKILGHGEPMLQTLQFES-WKDKVLEKEGFDIALKEFYDG--KVESLSY-RQPCEYLNI--DSQ-S  
 GmSE0-F1 VDCEIQRVVTKLLCLKQDQGWAILTKG--SNVRILGHGEPMRQTLAEFDFT-WKDKVFQKEGFDVAFDEYYKT--KLDELVA-RQQCAFVKN-----N  
 MtSE0-F1 IDCEIQDIVKSLCLKQDQGWAILTKG--YNVKLLGHGEPMYQTIAEFDI-WKDRVLQKEGFDIAFKEYYDT--KVKDTYV-RQPCEIINV--DNNIN  
 MtSE0-F2 VDCEIQTAVKLLCLKQDPLGWAILSRG--RHVTVFGHGEPMYQTVADFDK-WKNNVVEKESFDEAFKEYYDT--KLSEISS-SASAVN-----S  
 GmSE0-F2 VDCEIQEVVTRLLCLKQDPSGWVLSRG--RNLKILGHAEPMYQTVLDFEK-WKNVLEKETFDVAFKEYYDV--VKEKYA--SLPYDH-----T  
 GmSE0u VDCEIQEVVTRLLCLKQDPSGWVLRG--RNLKILGHAEPMYQTVLDFDK-WKSKVLEKETFDVAFKEYYDV--VKEKYA--SLPYDH-----T  
 AtSE0a EKDLVLQEVVAMLYGGEGDGWGLVSKA--SDMMVRAKGNLFRGLAEFNE-WEVNIPT-KGFLTALNDHLLM--RLP----PHHCTRFLM--PET-A  
 SpSE0b ETDPILOEIVTILSYDGSDLGWAVFSRG--LAEMTRGKGLDILVQVMKGFDR-WRDEVSDVITTFVPALDRQLRD--LHS----PHHCTRLLI--PST-T  
 SpSE0c ETDPILOEIVTILSYDGSDLGWAVFSRG--LAEMTRGKGLDILVQVMKGFDR-WRDEVSDVITTFVPALDRQLRD--LHS----PHHCTRLLI--PST-T  
 GmSE0e ENDHIMHEVMRLITYDSGDPGWAIVISQ--TGKMAQKGDITFLKCLNEHEQ-WKDAAKD-KGLLPAMDYIYE--LQT----PHHCTRLLI--PGT-S  
 SpSE0a QEDKVMQEVLTMLSFDSGQGWAILSRG--SFEMARAKSIIITKLTLEDYTI-WEEDARS-KGFVFPALLEYFLQ--LHT----PQHCRLLI--PGL-D  
 GmSE0c ENDDIMSQVMTVLSFDGSDRGWAIFCRG--ATEMARAKGDSALICLQDFDK-WKDRIEE-DGVVQAMNDYLNK--NKP----PHHCTRLLI--PGS-T  
 GmSE0d EKDEIMSVMVTLVLSFDGSDRGWAIFCRG--ATEMARAKGDSALRCLQDFDK-WKGRIEE-DGVVHAINDYLNK--NKP----PHHCTRLLI--PGS-T  
 AtSE0b DDDVVMQGIKLLSYDKLG--GWALLSKG--PEIVMIAHG-AIERTMSVYDRTWTKHVPT-KGYTKAMSDHHHDEVLRER--GKPCGHDFDHI--TAR-S  
 GmSE0m DDDVVMQGIKLLSYDKQG--GWIVLARG--SHIVVNGHATTGLQTLVEYDAVWKE-LADRDGFEPAPKKNHYDK--VHSI----VSPCCRFEF--SHS-M  
 MtSE0e DNDRVMQEIKLLSYDKQG--GWIVLARG--SQIVVNGHASTGLQSLIYDLMWKEHA-ERDGFETAFKHEYGK--LHAV----DNPCRFEF--SHS-M  
 GmSE0i SSDHVLAEISSLTLLMDREEGWAVIGCGSSSTDILRLQGMQVMEFLRKCSE-WRENITN-LGLHGALRNFLDPHFV-----EGSCNHSYFVSSRENE  
 MdSE0a -TDVTTEVQKLLSYKNEG--GWAIVLTKG--STVVVSGHGFTILKVLDDFDI-WKNFIKE-KGFEPFKAAYEK--VIQT----MRHCCRLDI--PSV-A  
 MdSE0b -ADQVQGEVQKLLSYKNEG--GWAIVLTKG--HSVVLTVGHGVSILRVVDFDK-WKDHVKE-RGFEPFKAAYEK--VIRT----SRPCRLLDI--PGS-T  
 MtSE0a -TNSVTQVQKLLSYKNEG--GWAIVLTKG--SIVLAVGHGTTVLKTFAEFET-WKGDVST-KGFEPFKAAYEK--VIQT----MRHCCRLDI--PSV-A  
 MtSE0b -TNTVTQVQKLLSYKNET--GWAIVLTKG--SIVTAVGHGTTVLKTFAEFET-WKGDVST-KGFEPFKAAYEK--VIRT----SRPCRLLDI--PGS-T  
 MtSE0c -TDVTTEVQKLLSYKNET--GWAIVLTKG--PSVVLVSGHGFTILKTVAEFEK-WKDVVVK-KGFEPFKAAYEK--VIRT----SRPCRLLDI--PGS-T  
 GmSE0s -ADAVTQEVQKLLSYKNET--GWAIVLTKG--PSVVLVSGHGFTILKTVAEFEK-WKDVVVK-KGFEPFKAAYEK--VIRT----SRPCRLLDI--PGS-T  
 GmSE0g -VDAVTQEVQKLLSYKNET--GWAIVLTKG--SSVVMVSGHGFTILKTVAEFEK-WKDVVVK-KGFEPFKAAYEK--VIRT----SRPCRLLDI--PGS-T  
 GmSE0r -VDAVTQEVQKLLSYKNET--GWAIVLTKG--SSVVMVSGHGFTILKTVAEFEK-WKDVVVK-KGFEPFKAAYEK--VIRT----SRPCRLLDI--PGS-T  
 GmSE0l VQDSTTEIQLMFLKQDPLGWAILTKG--SHVKLLGHGDAMLRVTFDFES-WKGTMHNVEVDFVAFKKNYDKCKVKS--PPKCEHREF--ANY-P  
 GmSE0o IDFATSEIKRLLFLKQDPLGWAILTKG--HNKLLGHGEPAYQTLAEFQW-WKDKVLEKEGFDIAFKEYYEM--KAKEISA-RQPCEIINV--DSY-S  
 GmSE0j VQDFATREIKRLLFLKQDPLGWAILTKG--YNVKLLGHGEPAYQTLAEFQW-WKDKVLEKEGFDIAFKEYYEM--KAKEISA-RQPCEIINV--DSY-S  
 GmSE0p VQDFATREIKRLLFLKQDPLGWAILTKG--YNVKLLGHGEPAYQTLAEFQW-WKDKVLEKEGFDIAFKEYYEM--KAKEISA-RQPCEIINV--DSY-S  
 MtSE0-F3 HKDPTIDEIKSLCLKQDQPGWVLLSKG--PNVKLLGRGDQMYATAVDFEI-WKEKVLKAGFDVAFKEYYEQ--KRRNY--PQECSHMQL--ANY-P  
 GmSE0a QKDPTIDEIKSLCLKQDQPGWVLLSKG--SNVKLLGGDPMLATAADFPEI-WKEKVLKAGFDVAFKEYYEQ--KRRNY--PQECSHMQL--ANY-P  
 GmSE0f HKDPTIDEIKSLCLKQDQPGWVLLSKG--SNVKLLGGDPMLATAADFPEI-WKEKVLKAGFDVAFKEYYEQ--KRRNY--PQECSHMQL--ANY-P

## Motif 1 (Rüping et al. 2010)

CgSE0a SNVLATITCPNASCGRVMEVTSVNYKCCHRD-----ASDTAKV-----  
 GmSE0-F3 DVLATITCPNASCGRVMEVTSVNYKCCHGG-----NVADHAIKSRSTTAT-----  
 GmSE0-F4 SVIATIAICPNPTCGRVMEVSSVNYKCCHRD-----DALNC-----  
 LjSE0-F1 ANVIATITCPNPMCGRVMEVTSVNYKCCHS D-----APNCFGI-----  
 MtSE0-F4 SNVIGTISCNPMCGRVMEVSSIHYYKCCHRD-----EPNNLGV-----  
**Group 1**  
 VIATIAICPNPMCGRVMEVSSAHYKCCHRD-----EPNMFV-----  
 VIATIAICPNPMCGRVMEVSSVHYKCCHRD-----EPNMFV-----  
 VIATITCPNPTCGRVMEVTSVNYKCCHRD-----GQKIC-----  
 GmSE0-F1 ADVLVTITCPNPTCGRVMEVTSVNYKCCHRD-----ASNMGNI-----  
 MtSE0-F1 CNVIATISCNPTCGRVMEVSSVNYKCCHRDAA--APQNGKI-----  
 MtSE0-F2 DVLATITCPNPMCGRVMEVTSVNYKCCHRD-----DPDSCCI-----  
 GmSE0-F2 SVLATITCPNPLCGRVMEVTSVNYKCCHG-----SANS CNL-----  
 GmSE0u SVLATITCPNPLCGRVMEVTSVNYKCCHG-----SANS CNL-----  
 AtSE0a GIIPNEVECTE--CRRTEK--YYLYQCCLLE-----  
 SpSE0b GHIPERVVCAE--CSRMEK--FIMYRCCTE-----  
 SpSE0c GHIPERVVCAE--CSRMEK--FIMYRCCTD-----  
 GmSE0e GGIPDKVSCAE--CGQTEK--FYMYRCCE-----  
 SpSE0a GDIPEMIVCAE--CGRAMER--FFMYRCCTD-----  
 GmSE0c GGIPQKVVCAE--CGRQMEK--YFMYRCCE-----  
 GmSE0d GGIPQKVVCAE--CGRQMEK--YFMYRCCE-----  
 AtSE0b GRIPKMNCFE--CQRPMEK--YMSFSCCHDEKHLH--EDENYNF-----  
 GmSE0m GRIPERLTCPE--CRRNMHV--LTTFQCCHDE-----KIDEDFFVSTVTPPTI-----  
 MtSE0e GRIPDRLTCPE--CRRNMHV--LTTFQCCHDD-----NVEEDFFVSSVTPPNTN-----  
 GmSE0i RPSQGTVMCQV--CKRPMKN--FVYVQP-----  
 MdSE0a GKVPETMKCPE--CPRTMET--FVSYKCCHTD-----SPINAHH-----  
 MdSE0b GKVPETMKCPD--CHRSMET--FISYKCCCHID-----GPTAHH-----  
 MtSE0a GKIPDFIKCPD--CHRTMEV--FISYKCCCHNG-----  
 MtSE0b GKIPDFIECPD--CHRTMEV--FISYKCCCHNG-----DKVNAEH-----  
 MtSE0c GKLPETIKCPD--CPSTMEI--FISYKCCCHN-----TNANGKH-----  
 GmSE0s GKLPETIKCSD--CPRVMEI--FISYKCCCHNE-----NTANAIH-----  
 GmSE0g GKLPETIRCPD--CGRIMEI--FISYKCNHRD-----NTSIAN-----  
 GmSE0r GKLPETIRCPD--CGRIMEI--FISYKCNHSD-----NTSIAN-----  
 GmSE0l TDILAHIPCPNK--CGHEMEVSSVYKCCCHGR-----EASDIA-----  
 GmSE0o MDILERIVCPKDCRRPMEVASVYKCCCHDR-----KK-----  
 GmSE0j TDILAHIPCPNMDCGRSMEVTSVNYKCCCHGL-----EP-----  
 GmSE0p TDILAHIPCPNMECGRSMEVTSVNYKCCCHGL-----EP-----  
 MtSE0-F3 SDILDPICYDSCNCRSMEIASVYKCCCHGH-----THENAEPAPESGGFVQIEKRS-----  
 GmSE0a ADILHPCNCPDAAACGRSMEIASVYKCCCHGQTAHKAQVPEESGDVMIKPKLYAS-----  
 GmSE0f ADILHPCNCPDAAACGRSMEIASVYKCCCHGQAHHKAQVPEESGDVMIKPKLYAS-----

**Fig. S3.** Incorporation of venus-tagged SEO-proteins into artificial forisomes following expression in *N. benthamiana* epidermal cells. (A) The venus-CgSEOa construct expressed alone does not assemble into a macromolecular protein body, but is distributed in the cytosol. (B, C) The co-expression of CgSEOa with MtSEO-F1 (B) or DpSEO-F1 (C) generates fluorescent artificial forisomes, due to incorporation of venus-CgSEOa. (D) Overlay of fluorescent and bright-field images of the expression of MtSEO-F3-venus, showing that MtSEO-F3-venus does not assemble into a macromolecular protein body, but fluorescent agglomerates can be detected. (E, F) Overlay of fluorescent and bright-field images of the co-expression of MtSEO-F1 + MtSEO-F3-venus (E) or MtSEO-F4 + MtSEO-F3-venus (F) shows that MtSEO-F3 is not incorporated into a protein body. Scale bars: (A) 50  $\mu\text{m}$ , (B-F) 10  $\mu\text{m}$ .

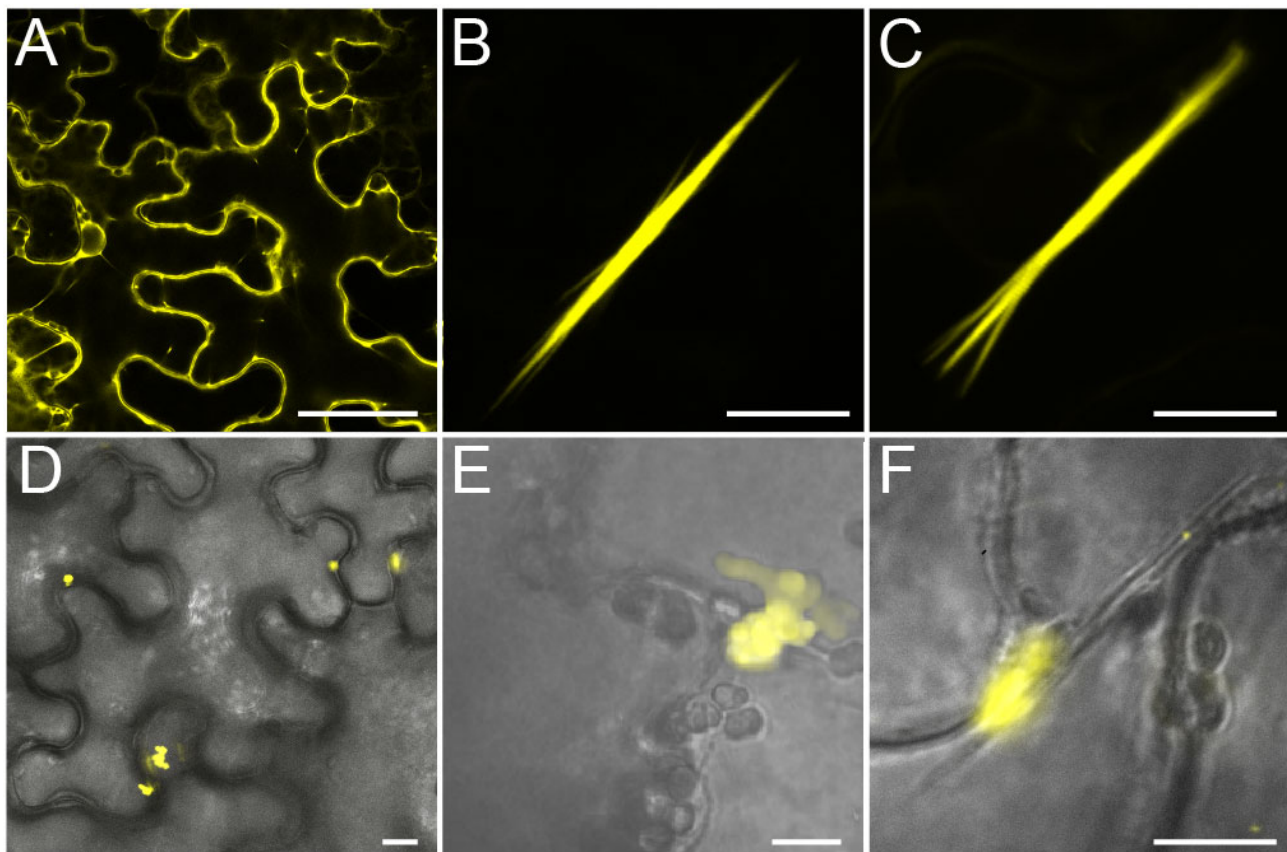

**Table S1.** Geometrical parameters of native and artificial forisomes. Standard deviations are indicated.

|               | <i>D. panamensis</i> | <i>L. japonicus</i> | <i>M. truncatula</i> | <i>P. sativum</i> | <i>V. faba</i> |
|---------------|----------------------|---------------------|----------------------|-------------------|----------------|
| Length (n=15) | 13.7 ± 1.7 µm        | 17.2 ± 1.7 µm       | 13.7 ± 2.6 µm        | 21.5 ± 3.7 µm     | 36.3 ± 4.5 µm  |
| Width (n=15)  | 1.7 ± 0.3 µm         | 2.1 ± 2.3 µm        | 2.1 ± 0.3 µm         | 2.5 ± 0.5 µm      | 3.4 ± 0.5 µm   |

|               | DpSEO-F1      | LjSEO-F1      | MtSEO-F1      | PsSEO-F1      | VfSEO-F1       |
|---------------|---------------|---------------|---------------|---------------|----------------|
| Length (n=15) | 23.7 ± 3.9 µm | 45.7 ± 6.9 µm | 37.4 ± 9.9 µm | 50.1 ± 8.2 µm | 42.2 ± 10.4 µm |
| Width (n=15)  | 2.8 ± 0.7 µm  | 2.8 ± 0.4 µm  | 2.0 ± 0.7 µm  | 1.2 ± 0.3 µm  | 1.6 ± 0.5 µm   |

**Literature not cited in the main text**

**Noll GA, Rüping B, Ernst AM, et al. 2009.** The promoters of forisome genes *MtSEO2* and *MtSEO3* direct gene expression to immature sieve elements in *Medicago truncatula* and *Nicotiana tabacum*. *Plant Molecular Biology Reporter* **27**: 526–533.

**Noll GA, Fontanellaz ME, Rüping B, et al. 2007.** Spatial and temporal regulation of the forisome gene *for1* in the phloem during plant development. *Plant Molecular Biology* **65**: 285–294.

**Sanger F, Nicklen S, Coulson AR. 1977.** DNA sequencing with chain-terminating inhibitors. *Proceedings of the National Academy of Sciences USA* **74**: 5463–5467.

**Tuteja N, Umate P, van Bel AJE. 2010.** Forisomes: calcium-powered protein complexes with potential as ‘smart’ biomaterials. *Trends in Biotechnology* **28**: 102–110.

**Yanisch-Perron C, Vieira J, Messing J. 1985.** Improved M13 phage cloning vectors and host strains: nucleotide sequences of the M13mp18 and pUC19 vectors. *Gene* **33**: 103–19.
